# Supplementary material for: Risk of endometrial cancer in patients with polycystic ovarian syndrome: A meta‑analysis
Source: PubMed Central journal article supplement — Oncol Lett. 2023 Mar 8;25(4):168. doi: 10.3892/ol.2023.13754 (PMC10028221; doi:10.3892/ol.2023.13754), 2023-03-08
Supplement: Supplementary_Data.pdf [file Supplementary_Data.pdf]

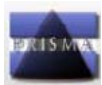

## PRISMA 2020 Checklist

| <b>Appendix S1.</b>           |               |                                                                                                                                                                                                                                                                                                      |                                        |
|-------------------------------|---------------|------------------------------------------------------------------------------------------------------------------------------------------------------------------------------------------------------------------------------------------------------------------------------------------------------|----------------------------------------|
| <b>Section and Topic</b>      | <b>Item #</b> | <b>Checklist item</b>                                                                                                                                                                                                                                                                                | <b>Location where item is reported</b> |
| <b>TITLE</b>                  |               |                                                                                                                                                                                                                                                                                                      |                                        |
| Title                         | 1             | Identify the report as a systematic review.                                                                                                                                                                                                                                                          | n/a                                    |
| <b>ABSTRACT</b>               |               |                                                                                                                                                                                                                                                                                                      |                                        |
| Abstract                      | 2             | See the PRISMA 2020 for Abstracts checklist.                                                                                                                                                                                                                                                         | 1                                      |
| <b>INTRODUCTION</b>           |               |                                                                                                                                                                                                                                                                                                      |                                        |
| Rationale                     | 3             | Describe the rationale for the review in the context of existing knowledge.                                                                                                                                                                                                                          | 1-2                                    |
| Objectives                    | 4             | Provide an explicit statement of the objective(s) or question(s) the review addresses.                                                                                                                                                                                                               | 1-2                                    |
| <b>METHODS</b>                |               |                                                                                                                                                                                                                                                                                                      |                                        |
| Eligibility criteria          | 5             | Specify the inclusion and exclusion criteria for the review and how studies were grouped for the syntheses.                                                                                                                                                                                          | 2                                      |
| Information sources           | 6             | Specify all databases, registers, websites, organisations, reference lists and other sources searched or consulted to identify studies. Specify the date when each source was last searched or consulted.                                                                                            | 2                                      |
| Search strategy               | 7             | Present the full search strategies for all databases, registers and websites, including any filters and limits used.                                                                                                                                                                                 | 2, Fig. 1, Appendix S3                 |
| Selection process             | 8             | Specify the methods used to decide whether a study met the inclusion criteria of the review, including how many reviewers screened each record and each report retrieved, whether they worked independently, and if applicable, details of automation tools used in the process.                     | 2                                      |
| Data collection process       | 9             | Specify the methods used to collect data from reports, including how many reviewers collected data from each report, whether they worked independently, any processes for obtaining or confirming data from study investigators, and if applicable, details of automation tools used in the process. | 2                                      |
| Data items                    | 10a           | List and define all outcomes for which data were sought. Specify whether all results that were compatible with each outcome domain in each study were sought (e.g. for all measures, time points, analyses), and if not, the methods used to decide which results to collect.                        | 2                                      |
|                               | 10b           | List and define all other variables for which data were sought (e.g. participant and intervention characteristics, funding sources). Describe any assumptions made about any missing or unclear information.                                                                                         | 2                                      |
| Study risk of bias assessment | 11            | Specify the methods used to assess risk of bias in the included studies, including details of the tool(s) used, how many reviewers assessed each study and whether they worked independently, and if applicable, details of automation tools used in the process.                                    | 2                                      |
| Effect measures               | 12            | Specify for each outcome the effect measure(s) (e.g. risk ratio, mean difference) used in the synthesis or presentation of results.                                                                                                                                                                  | 2                                      |
| Synthesis methods             | 13a           | Describe the processes used to decide which studies were eligible for each synthesis (e.g. tabulating the study intervention characteristics and comparing against the planned groups for each synthesis (item #5)).                                                                                 | 2                                      |
|                               | 13b           | Describe any methods required to prepare the data for presentation or synthesis, such as handling of missing summary statistics, or data conversions.                                                                                                                                                | n/a                                    |

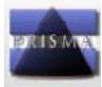

## PRISMA 2020 Checklist

| Appendix S1.                  |        |                                                                                                                                                                                                                                                                                      |                                 |
|-------------------------------|--------|--------------------------------------------------------------------------------------------------------------------------------------------------------------------------------------------------------------------------------------------------------------------------------------|---------------------------------|
| Section and Topic             | Item # | Checklist item                                                                                                                                                                                                                                                                       | Location where item is reported |
|                               | 13c    | Describe any methods used to tabulate or visually display results of individual studies and syntheses.                                                                                                                                                                               | 2                               |
|                               | 13d    | Describe any methods used to synthesize results and provide a rationale for the choice(s). If meta-analysis was performed, describe the model(s), method(s) to identify the presence and extent of statistical heterogeneity, and software package(s) used.                          | 2                               |
|                               | 13e    | Describe any methods used to explore possible causes of heterogeneity among study results (e.g. subgroup analysis, meta-regression).                                                                                                                                                 | 2                               |
|                               | 13f    | Describe any sensitivity analyses conducted to assess robustness of the synthesized results.                                                                                                                                                                                         | 2                               |
| Reporting bias assessment     | 14     | Describe any methods used to assess risk of bias due to missing results in a synthesis (arising from reporting biases).                                                                                                                                                              | 2                               |
| Certainty assessment          | 15     | Describe any methods used to assess certainty (or confidence) in the body of evidence for an outcome.                                                                                                                                                                                | 2                               |
| <b>RESULTS</b>                |        |                                                                                                                                                                                                                                                                                      |                                 |
| Study selection               | 16a    | Describe the results of the search and selection process, from the number of records identified in the search to the number of studies included in the review, ideally using a flow diagram.                                                                                         | 2-3, Fig 1                      |
|                               | 16b    | Cite studies that might appear to meet the inclusion criteria, but which were excluded, and explain why they were excluded.                                                                                                                                                          | 2-3, Fig 1                      |
| Study characteristics         | 17     | Cite each included study and present its characteristics.                                                                                                                                                                                                                            | Table 1                         |
| Risk of bias in studies       | 18     | Present assessments of risk of bias for each included study.                                                                                                                                                                                                                         | 3, Table SI-III                 |
| Results of individual studies | 19     | For all outcomes, present, for each study: (a) summary statistics for each group (where appropriate) and (b) an effect estimate and its precision (e.g. confidence/credible interval), ideally using structured tables or plots.                                                     | 6, Fig 2                        |
| Results of syntheses          | 20a    | For each synthesis, briefly summarise the characteristics and risk of bias among contributing studies.                                                                                                                                                                               | 3, Table 1, Tables SI-III       |
|                               | 20b    | Present results of all statistical syntheses conducted. If meta-analysis was done, present for each the summary estimate and its precision (e.g. confidence/credible interval) and measures of statistical heterogeneity. If comparing groups, describe the direction of the effect. | 6, Fig 2                        |
|                               | 20c    | Present results of all investigations of possible causes of heterogeneity among study results.                                                                                                                                                                                       | 6, Fig 2                        |
|                               | 20d    | Present results of all sensitivity analyses conducted to assess the robustness of the synthesized results.                                                                                                                                                                           | 3, Tables SI-III                |
| Reporting biases              | 21     | Present assessments of risk of bias due to missing results (arising from reporting biases) for each synthesis assessed.                                                                                                                                                              | 3, Tables SI-III                |

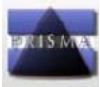

## PRISMA 2020 Checklist

| <b>Appendix S1.</b>                            |               |                                                                                                                                                                                                                                            |                                        |
|------------------------------------------------|---------------|--------------------------------------------------------------------------------------------------------------------------------------------------------------------------------------------------------------------------------------------|----------------------------------------|
| <b>Section and Topic</b>                       | <b>Item #</b> | <b>Checklist item</b>                                                                                                                                                                                                                      | <b>Location where item is reported</b> |
| Certainty of evidence                          | 22            | Present assessments of certainty (or confidence) in the body of evidence for each outcome assessed.                                                                                                                                        | 3, Tables SI-III                       |
| <b>DISCUSSION</b>                              |               |                                                                                                                                                                                                                                            |                                        |
| Discussion                                     | 23a           | Provide a general interpretation of the results in the context of other evidence.                                                                                                                                                          | 7                                      |
|                                                | 23b           | Discuss any limitations of the evidence included in the review.                                                                                                                                                                            | 7                                      |
|                                                | 23c           | Discuss any limitations of the review processes used.                                                                                                                                                                                      | 7                                      |
|                                                | 23d           | Discuss implications of the results for practice, policy, and future research.                                                                                                                                                             | 8                                      |
| <b>OTHER INFORMATION</b>                       |               |                                                                                                                                                                                                                                            |                                        |
| Registration and protocol                      | 24a           | Provide registration information for the review, including register name and registration number, or state that the review was not registered.                                                                                             | n/a                                    |
|                                                | 24b           | Indicate where the review protocol can be accessed, or state that a protocol was not prepared.                                                                                                                                             | n/a                                    |
|                                                | 24c           | Describe and explain any amendments to information provided at registration or in the protocol.                                                                                                                                            | n/a                                    |
| Support                                        | 25            | Describe sources of financial or non-financial support for the review, and the role of the funders or sponsors in the review.                                                                                                              | 8                                      |
| Competing interests                            | 26            | Declare any competing interests of review authors.                                                                                                                                                                                         | 8                                      |
| Availability of data, code and other materials | 27            | Report which of the following are publicly available and where they can be found: template data collection forms; data extracted from included studies; data used for all analyses; analytic code; any other materials used in the review. | 8                                      |

From: (21)

For more information, visit: <http://www.prisma-statement.org/>

## Appendix S2

### MOOSE Checklist for Meta-analyses of Observational Studies

| Item No                                     | Recommendation                                                                                                                                                                                                                                                               | Reported on Page No |
|---------------------------------------------|------------------------------------------------------------------------------------------------------------------------------------------------------------------------------------------------------------------------------------------------------------------------------|---------------------|
| Reporting of background should include      |                                                                                                                                                                                                                                                                              |                     |
| 1                                           | Problem definition                                                                                                                                                                                                                                                           | 2-3                 |
| 2                                           | Hypothesis statement                                                                                                                                                                                                                                                         | N/A                 |
| 3                                           | Description of study outcome(s)                                                                                                                                                                                                                                              | 3                   |
| 4                                           | Type of exposure or intervention used                                                                                                                                                                                                                                        | 3                   |
| 5                                           | Type of study designs used                                                                                                                                                                                                                                                   | 3                   |
| 6                                           | Study population                                                                                                                                                                                                                                                             | 2-3                 |
| Reporting of search strategy should include |                                                                                                                                                                                                                                                                              |                     |
| 7                                           | Qualifications of searchers (eg, librarians and investigators)                                                                                                                                                                                                               | Title page          |
| 8                                           | Search strategy, including time period included in the synthesis and key words                                                                                                                                                                                               | 3                   |
| 9                                           | Effort to include all available studies, including contact with authors                                                                                                                                                                                                      | 3-4                 |
| 10                                          | Databases and registries searched                                                                                                                                                                                                                                            | 3-4                 |
| 11                                          | Search software used, name and version, including special features used (eg, explosion)                                                                                                                                                                                      | N/A                 |
| 12                                          | Use of hand searching (eg, reference lists of obtained articles)                                                                                                                                                                                                             | 3                   |
| 13                                          | List of citations located and those excluded, including justification                                                                                                                                                                                                        | Fig 1, 4-5          |
| 14                                          | Method of addressing articles published in languages other than English                                                                                                                                                                                                      | 3                   |
| 15                                          | Method of handling abstracts and unpublished studies                                                                                                                                                                                                                         | 3                   |
| 16                                          | Description of any contact with authors                                                                                                                                                                                                                                      | N/A                 |
| Reporting of methods should include         |                                                                                                                                                                                                                                                                              |                     |
| 17                                          | Description of relevance or appropriateness of studies assembled for assessing the hypothesis to be tested                                                                                                                                                                   | 3-5                 |
| 18                                          | Rationale for the selection and coding of data (eg, sound clinical principles or convenience)                                                                                                                                                                                | 3-5                 |
| 19                                          | Documentation of how data were classified and coded (eg, multiple raters, blinding and interrater reliability)                                                                                                                                                               | 4-5                 |
| 20                                          | Assessment of confounding (eg, comparability of cases and controls in studies where appropriate)                                                                                                                                                                             | 4-5                 |
| 21                                          | Assessment of study quality, including blinding of quality assessors, stratification or regression on possible predictors of study results                                                                                                                                   | 5                   |
| 22                                          | Assessment of heterogeneity                                                                                                                                                                                                                                                  | 4-5, Fig 2          |
| 23                                          | Description of statistical methods (eg, complete description of fixed or random effects models, justification of whether the chosen models account for predictors of study results, dose-response models, or cumulative meta-analysis) in sufficient detail to be replicated | 4-5                 |
| 24                                          | Provision of appropriate tables and graphics                                                                                                                                                                                                                                 | Table 1, Figs 1-3   |
| Reporting of results should include         |                                                                                                                                                                                                                                                                              |                     |
| 25                                          | Graphic summarizing individual study estimates and overall estimate                                                                                                                                                                                                          | Fig 2               |
| 26                                          | Table giving descriptive information for each study included                                                                                                                                                                                                                 | Table 1             |
| 27                                          | Results of sensitivity testing (eg, subgroup analysis)                                                                                                                                                                                                                       | Fig 2               |
| 28                                          | Indication of statistical uncertainty of findings                                                                                                                                                                                                                            | 5-6                 |

| Item No                                 | Recommendation                                                                                                            | Reported on Page No |
|-----------------------------------------|---------------------------------------------------------------------------------------------------------------------------|---------------------|
| Reporting of discussion should include  |                                                                                                                           |                     |
| 29                                      | Quantitative assessment of bias (eg, publication bias)                                                                    | 6, Fig 3            |
| 30                                      | Justification for exclusion (eg, exclusion of non-English language citations)                                             | 6-9                 |
| 31                                      | Assessment of quality of included studies                                                                                 | 6-8, Tables SI-III  |
| Reporting of conclusions should include |                                                                                                                           |                     |
| 32                                      | Consideration of alternative explanations for observed results                                                            | 7-9                 |
| 33                                      | Generalization of the conclusions (ie, appropriate for the data presented and within the domain of the literature review) | 9                   |
| 34                                      | Guidelines for future research                                                                                            | 9                   |
| 35                                      | Disclosure of funding source                                                                                              | 9                   |

From: (22)

## Appendix S3. Search strategies

### 1. PubMed

#1 "polycystic ovary syndrome"[MeSH Terms] OR "polycystic ovary syndrome"[MeSH Terms] OR "polycystic ovary syndrome"[MeSH Terms] (17,157)

#2 ("polycystic"[All Fields] AND "ovar\*"[All Fields]) OR "pcos"[All Fields] OR "pco"[All Fields] OR (("stein"[All Fields] OR "steins"[All Fields]) AND ("leventhal"[All Fields] OR "leventhal s"[All Fields])) (29,522)

#3 #1 OR #2 (29,522)

#4 "endometrial neoplasms"[MeSH Terms] OR "uterine neoplasms"[MeSH Terms] OR "carcinoma, endometrioid"[MeSH Terms] OR "endometrial stromal tumors"[MeSH Terms] OR "sarcoma, endometrial stromal"[MeSH Terms] OR "leiomyosarcoma"[MeSH Terms] (151,522)

#5 (endometri\* cancer [All Fields]) OR (endometri\* tumor [All Fields]) OR (endometri\* neoplasm [All Fields]) OR (endometri\* carcinoma [All Fields]) OR (endometri\* sarcoma [All Fields]) OR (uter\* cancer [All Fields]) OR (uter\* carcinoma [All Fields]) OR (uter\* tumor [All Fields]) OR (uter\* sarcoma [All Fields]) OR (uter\* neoplasm [All Fields]) OR (leiomyosarcoma [All Fields]) OR (myosarcoma [All Fields]) (267,860)

#6 #4 OR #5 (267, 860)

#7 #3 AND #6 (1,987)

### 2. Medline

#1 "polycystic ovary syndrome"[MeSH Terms] OR "polycystic ovary syndrome"[MeSH Terms] OR "polycystic ovary syndrome"[MeSH Terms] (17,157)

#2 ("polycystic"[All Fields] AND "ovar\*"[All Fields]) OR "pcos"[All Fields] OR "pco"[All Fields] OR (("stein"[All Fields] OR "steins"[All Fields]) AND ("leventhal"[All Fields] OR "leventhal s"[All Fields])) (25,570)

#3 #1 OR #2 (25,570)

#4 "endometrial neoplasms"[MeSH Terms] OR "uterine neoplasms"[MeSH Terms] OR "carcinoma, endometrioid"[MeSH Terms] OR "endometrial stromal tumors"[MeSH Terms] OR "sarcoma, endometrial stromal"[MeSH Terms] OR "leiomyosarcoma"[MeSH Terms] (151,522)

#5 (endometri\* cancer [All Fields]) OR (endometri\* tumor [All Fields]) OR (endometri\* neoplasm [All Fields]) OR (endometri\* carcinoma [All Fields]) OR (endometri\* sarcoma [All Fields]) OR (uter\* cancer [All Fields]) OR (uter\* carcinoma [All Fields]) OR (uter\* tumor [All Fields]) OR (uter\* sarcoma [All Fields]) OR (uter\* neoplasm [All Fields]) OR (leiomyosarcoma [All Fields]) OR (myosarcoma [All Fields]) (255,744)

#6 #4 OR #5 (255, 744)

#7 #3 AND #6 (1,891)

### 3. Embase

#1 exp ovary polycystic disease/ (33,163)

#2 polycystic ovary syndrome.mp (21,761)

#3 polycystic ovary.mp (22,541)

#4 polycystic ovarian syndrome.mp (5,868)

#5 pcos.mp (21,869)

#6 pco.mp (5,263)

#7 stein leventhal.mp (408)

#8 stein leventhal syndrome.mp (389)

#9 #1 or #2 or #3 or #4 or #5 or #6 or #7 or #8 (41,074)

#10 exp endometrium cancer/ (155,863)

#11 exp endometrium tumor/ (75,087)

#12 exp uterus cancer/ (179,516)

#13 exp endometrium carcinoma/ (22,989)

#14 exp endometrium sarcoma/ (2320)

#15 exp uterus carcinoma/ (56,557)

#16 exp uterus tumor/ (229,523)

#17 exp uterus sarcoma/ (5,527)

#18 exp leiomyosarcoma/ (16,425)

#19 exp myosarcoma/ (35,768)

#20 #10 or #11 or #12 or #13 or #14 or #15 or #16 or #17 or #18 or #19 (261,817)

#21 #9 and #20 (1,536)

#### 4. Cochrane Library

#1 (endometri\* or uter\*) AND (polycystic OR pco\* OR stein\* OR leventhal) (1,082)

#### 5. Scopus

#1( polycystic AND ovar\* ) OR ( pcos ) OR ( pco ) OR ( stein AND leventhal )  
(158,223)



#2 (endometri\* AND cancer ) OR ( endometri\* AND tumor ) OR ( endometri\* AND neoplasm ) OR ( endometri\* AND carcinoma ) OR ( endometri\* AND sarcoma ) OR ( uter\* AND cancer ) OR ( uter\* AND carcinoma ) OR ( uter\* AND tumor ) OR ( uter\* AND sarcoma ) OR ( uter\* AND neoplasm ) OR ( leiomyosarcoma ) OR ( myosarcoma ) (678,307)

#3 #1 AND #2 (17,769)

Table SI. Evaluation of the methodological quality of the six case-control studies included in the present meta-analysis using adapted versions of the NOS.

| First author, year            | PCOS case definition adequate | Representativeness of PCOS cases | Selection of non-PCOS controls | Definition of non-PCOS controls | Comparability of both groups | Ascertainment of diagnosis | Same ascertainment method for both groups | Non-response rate | NOS score | (Refs.) |
|-------------------------------|-------------------------------|----------------------------------|--------------------------------|---------------------------------|------------------------------|----------------------------|-------------------------------------------|-------------------|-----------|---------|
| Escobedo <i>et al</i> , 1991  | X                             | X                                | X                              | X                               | X                            | •                          | X                                         | •                 | 2         | (31)    |
| Niwa <i>et al</i> , 2000      | X                             | X                                | •                              | •                               | X                            | •                          | •                                         | X                 | 4         | (30)    |
| Iatrakis <i>et al</i> , 2006  | X                             | X                                | X                              | •                               | X                            | •                          | •                                         | X                 | 3         | (33)    |
| Zucchetto <i>et al</i> , 2009 | X                             | X                                | •                              | •                               | •                            | •                          | •                                         | •                 | 6         | (34)    |
| Fearnley <i>et al</i> , 2010  | X                             | •                                | •                              | •                               | X                            | •                          | •                                         | X                 | 5         | (35)    |
| Kilicdag <i>et al</i> , 2011  | •                             | •                                | •                              | X                               | X                            | •                          | •                                         | •                 | 6         | (27)    |

X denotes no score, • denotes the score value. NOS, Newcastle-Ottawa Scale; PCOS, polycystic ovarian syndrome.

Table SII. Evaluation of the methodological quality of the three cohort studies included in the present meta-analysis using adapted versions of the NOS.

| First author, year       | Representativeness of PCOS cohort | Selection of non-PCOS controls | Ascertainment of diagnosis | Demonstration that outcome was not present at start of study | Comparability of cohorts on the basis of the design or analysis | Assessment of outcome | Follow up long enough for outcome to occur | Adequacy of follow up of cohorts | NOS score | (Refs.) |
|--------------------------|-----------------------------------|--------------------------------|----------------------------|--------------------------------------------------------------|-----------------------------------------------------------------|-----------------------|--------------------------------------------|----------------------------------|-----------|---------|
| Wild <i>et al</i> , 2000 | •                                 | •                              | •                          | X                                                            | •                                                               | X                     | •                                          | X                                | 5         | (32)    |
| Shen <i>et al</i> , 2015 | •                                 | •                              | •                          | •                                                            | ••                                                              | •                     | X                                          | X                                | 7         | (29)    |
| Ding <i>et al</i> , 2018 | •                                 | •                              | •                          | •                                                            | ••                                                              | •                     | X                                          | X                                | 7         | (28)    |

X denotes no score, • denotes the score value. NOS, Newcastle-Ottawa Scale; PCOS, polycystic ovarian syndrome.

Table SIII. Evaluation of the methodological quality of the one cross-sectional study included in the present meta-analysis using adapted versions of the NOS.

| First author, year         | Representativeness of sample | Sample size | Non-respondents | Ascertainment of the exposure | Comparability of outcome groups on the basis of the design or analysis | Assessment of outcome | Use of statistical test | NOS score | (Refs.) |
|----------------------------|------------------------------|-------------|-----------------|-------------------------------|------------------------------------------------------------------------|-----------------------|-------------------------|-----------|---------|
| Pillay <i>et al</i> , 2006 | X                            | X           | X               | •                             | ••                                                                     | ••                    | •                       | 6         | (15)    |

X denotes no score, • denotes the score value. NOS, Newcastle-Ottawa Scale
